# Supplementary material for: Insight into Population Structure and Drug Resistance of Pediatric Tuberculosis Strains from China and Russia Gained through Whole-Genome Sequencing
Source: Int J Mol Sci. 2023 Jun 18;24(12):10302. doi: 10.3390/ijms241210302 (PMC10299545; doi:10.3390/ijms241210302)
Supplement: Supplementary file 1 [file ijms-24-10302-s001.zip]

Archive with 6 entries (6 files):
- Expanded legend to Figure S1.pdf
- Figure S1.jpg
- Figure S2.pdf
- Figure S3.pdf
- Table S1 R1.xlsx
- Table_S2.xlsx
