# Supplementary material for: Insight into Population Structure and Drug Resistance of Pediatric Tuberculosis Strains from China and Russia Gained through Whole-Genome Sequencing
Source: Int J Mol Sci. 2023 Jun 18;24(12):10302. doi: 10.3390/ijms241210302 (PMC10299545; doi:10.3390/ijms241210302)
Supplement: Supplementary file 1 [file ijms-24-10302-s001.zip › Table S1 R1.xlsx]

## Sheet: All data
Table S1 Genotypic and phenotypic information on the studied M. tuberculosis strains (origin, demographic information, genotype, phenotypical drug resistance profile, mutations)
ID	origin	age	sex	material	data	new case/previously treated case	Treatment (intensive phase, cotinuation phase)	genotypes	DR type	RIF phenotype	rpoB complete	rpoB RRDR	rpoC	Rv2752c	INH phenotype	katG	inhA	fabG1	ahpC	Rv1258c	Rv2752c	EMB phenotype	embC	embB	embA	ubiA	PZA phenotype	pncA	Rv3236c	PPE35	ETH phenotype	mshA	ethA	inhA	ndh	Rv3083	KAN phenotype	whiB7	whiB6	rrs	eis	STR phenotype	rrs/rpsL	rrs	whiB6	whiB7	gid B	MXF/OFX/LEV phenotype	gyrA
IM25-2034	Russia		male	bone	2012	new case	continuation phase	L2.2.1 Beijing Central Asian Russian	MDR	R	rpoB[Rv0667:1349_C>T(S450L)]	rpoB[Rv0667:1349_C>T(S450L)]	wt	wt	R	katG[Rv1908c:944_C>G(S315T)]	wt	wt	wt	wt	wt	R	wt	embB[Rv3795:918_G>C(M306I)]	wt	wt	no data	pncA[Rv2043c:422_T>G(Q141P)]			S		ethA[Rv3854c:182_G>A(T61M)]				R	whiB7_a-116g[IGR_3568680 _3569108:3568795_T>C]	whiB6[Rv3862c:254_C>T(G85D)]		eis_c-14t[IGR_2715333 _2715471:2715346_G>A]	R	rpsL[Rv0682:128_A>G(K43R)]					S
IM26-4187	Russia	1.2	male	bone	2012	new case	continuation phase	L2.2.1 Beijing Asian Modern 2	mono resistant	S	wt	wt	wt	wt	R	wt	wt	wt	ahpC_c-52t [IGR_2726088_2726192:2726141_C>T]	wt	wt	S	wt	wt	embA[Rv3794:1672_G>C(V558L)]	wt	no data				S						S					S						S
IM27-5849	Russia	14.5	male	bone	2012	new case	continuation phase	L2.2.1 Beijing B0/W148	MDR	R	rpoB[Rv0667:124_C>G(L42V)], rpoB[Rv0667:1349_C>T(S450L)]	rpoB[Rv0667:1349_C>T(S450L)]	wt	wt	R	katG[Rv1908c:944_C>G(S315T)]	wt	wt	wt	wt	wt	R	wt	embB[Rv3795:916_A>G(M306V)]	wt	wt	no data	pncA[Rv2043c:281_A>G(F94S)]			S		ethA[Rv3854c:263_G>A(T88I)]				S					R	rpsL[Rv0682:128_A>G(K43R)]					S
IM28-2036	Russia		male	vertebrae	2011	new case	continuation phase	L2.2.1 Beijing Central Asian Russian	preXDR	R	wt	wt	wt	wt	R	katG[Rv1908c:944_C>G(S315T)]	wt	wt	wt	wt	wt	R	wt	wt	wt	wt	R				R						S					R						R
IM29-10470	Russia	1.8	male	vertebrae	2015	new case	continuation phase	L4.2.1 (Ural)	preXDR	R	rpoB[Rv0667:1349_C>T(S450L)]	rpoB[Rv0667:1349_C>T(S450L)]	wt	wt	R	katG[Rv1908c:944_C>G(S315T)]	wt	fabG1_c-15t [IGR_1673300_1673439:1673425_C>T]	wt	wt	wt	S	wt	embB[Rv3795:916_A>G(M306V)]	wt	wt	no data				R		ethA[Rv3854c:842_T>G(H281P)]	inhA_c-777t_(fabG1_c-15t) [IGR_1673300_1673439:1673425_C>T]			R				eis_c-12a[IGR_2715333 _2715471:2715344_G>A]	R						R	gyrA[Rv0006:280_G>A(D94N)]
IM30-9765	Russia	10	male	vertebrae	2011	new case	continuation phase	L2.2.1 Beijing Central Asian Russian	MDR	R	rpoB[Rv0667:1349_C>T(S450L)]	rpoB[Rv0667:1349_C>T(S450L)]	wt	wt	R	katG[Rv1908c:944_C>G(S315T)]	wt	wt	ahpC_g-48a [IGR_2726088_2726192:2726145_G>A]	wt	wt	R	wt	embB[Rv3795:916_A>G(M306V)]	embA_c-12t [IGR_4243148_4243232:4243221_C>T]	wt	R	pncA[Rv2043c:340_T>G(T114P)]			S		ethA[Rv3854c:842_T>G(H281P)]				R			rrs_a1401g[rrs:1473246_A>G]		R	rpsL[Rv0682:128_A>G(K43R)]					S	gyrA[Rv0006:1733_G>A(R578Q)]
IM31-6548	Russia	2.4	male	vertebrae	2011	new case	continuation phase	L2.2.1 Beijing Central Asian Russian	poly resistant	S	wt	wt	wt	wt	R	katG[Rv1908c:944_C>G(S315T)]	wt	wt	wt	wt	wt	S	wt	wt	wt	wt	R				S						S					R	rpsL[Rv0682:128_A>G(K43R)]					S
IM32-4026	Russia	1.1	male	vertebrae	2008	new case	continuation phase	L2.2.1 Beijing Central Asian Russian	MDR	R	rpoB[Rv0667:1289_T>C(L430P)], rpoB[Rv0667:1333_C>A(H445N)]	rpoB[Rv0667:1289_T>C(L430P)], rpoB[Rv0667:1333_C>A(H445N)]	wt	wt	R	katG[Rv1908c:944_C>G(S315T)]	wt	fabG1_c-15t [IGR_1673300_1673439:1673425_C>T]	wt	wt	wt	R	wt	embB[Rv3795:1040_G>T(S347I)]	wt	wt	no data	pncA[Rv2043c:3_C>T(M1I)]			S			inhA_c-777t_(fabG1_c-15t) [IGR_1673300_1673439:1673425_C>T]			R		whiB6_g-42t[IGR_4338522 _4338848:4338563_C>A]		eis_g-37t[IGR_2715333 _2715471:2715369_C>A]	R	rpsL[Rv0682:128_A>G(K43R)]	rrs_c517t[rrs:1472362_C>T]				S
IM33-5999	Russia	2.3	male	bone	2008	new case	continuation phase	L2.2.1 Beijing Central Asian Russian	MDR	R	rpoB[Rv0667:1355_T>C(L452P)]	rpoB[Rv0667:1355_T>C(L452P)]	wt	wt	R	katG[Rv1908c:944_C>G(S315T)]	wt	wt	wt	wt	wt	S	wt	wt	wt	wt	no data				S						S					R	rpsL[Rv0682:128_A>G(K43R)]					S
IM34-4338	Russia	14	male	bone	2008	new case	continuation phase	L2.2.1 Beijing Central Asian Russian	MDR	R	rpoB[Rv0667:1349_C>T(S450L)], rpoB[Rv0667:1438_A>G(I480V)]	rpoB[Rv0667:1349_C>T(S450L)]	wt	wt	R	katG[Rv1908c:944_C>G(S315T)]	wt	wt	wt	wt	wt	S	wt	wt	wt	wt	no data				S		ethA[Rv3854c:1361_G>A(P454L)]				R			rrs_a1401g[rrs:1473246_A>G]		R	rpsL[Rv0682:128_A>G(K43R)]					S
IM35-1621	Russia	1.9	female	bone	2009	new case	continuation phase	L2.2.1 Beijing Central Asian Russian	MDR	R	rpoB[Rv0667:1349_C>T(S450L)]	rpoB[Rv0667:1349_C>T(S450L)]	wt	wt	R	katG[Rv1908c:944_C>G(S315T)]	wt	wt	wt	wt	wt	S	wt	embB[Rv3795:1061_A>C(D354A)]	wt	wt	R				R		ethA_t-7c[IGR_4327474_ 4327548:4327480_A>G]				S		whiB6_g-42t[IGR_4338522 _4338848:4338563_C>A]			R						S
IM36-5421	Russia	2.3	male	vertebrae	2013	new case	continuation phase	L2.2.1 Beijing Central Asian Russian	poly resistant	S	wt	wt	wt	wt	S	wt	wt	fabG1_c-15t [IGR_1673300_1673439:1673425_C>T]	wt	wt	wt	S	wt	wt	wt	wt	no data			PPE35_g-11a [IGR_2170613_2171060:2170623_C>T]	S			inhA_c-777t_(fabG1_c-15t) [IGR_1673300_1673439:1673425_C>T]			S					R	rpsL[Rv0682:128_A>G(K43R)]					S
IM37-1330	Russia	3.1	female	bone	2013	new case	continuation phase	L2.2.1 Beijing Central Asian Russian	MDR	R	rpoB[Rv0667:1349_C>T(S450L)]	rpoB[Rv0667:1349_C>T(S450L)]	wt	wt	R	katG[Rv1908c:325_C>T(A109T)]	wt	wt	wt	wt	wt	R	wt	embB[Rv3795:1217_G>C(G406A)]	wt	wt	no data	pncA[Rv2043c:424_T>C(T142A)]			R			inhA[Rv1484:280_T>G(S94A) ], inhA_c-777t_(fabG1_c-15t) [IGR_1673300_1673439:1673425_C>T]			S					R	rpsL[Rv0682:128_A>G(K43R)]		whiB6[Rv3862c:319_G>A(R107C)]			S
IM38-2720	Russia	1	male	bone	2012	new case	continuation phase	L4.4.1.1 (S)	MDR	R	rpoB[Rv0667:1349_C>T(S450L)]	rpoB[Rv0667:1349_C>T(S450L)]	wt	wt	R	katG[Rv1908c:944_C>G(S315T)]	wt	wt	wt	wt	wt	R	wt	embB[Rv3795:1061_A>C(D354A)]	wt	wt	no data				S		ethA[Rv3854c:227_G>T(A76D)]		ndh[Rv1854c:53_A>G(V18A)]		R			rrs_a1401g[rrs:1473246_A>G]		R	rpsL[Rv0682:128_A>G(K43R)]					S
IM39-5629	Russia	10	female	bronchus	2014	new case	continuation phase	L2.2.1 Beijing Central Asian Russian	MDR	R	rpoB[Rv0667:1349_C>T(S450L)]	rpoB[Rv0667:1349_C>T(S450L)]	wt	wt	R	katG[Rv1908c:944_C>G(S315T)]	wt	wt	wt	wt	wt	R	wt	embB[Rv3795:916_A>G(M306V)]	wt	wt	no data	pncA[Rv2043c:403_T>G(T135P)]			S						R			rrs_a1401g[rrs:1473246_A>G]		R	rpsL[Rv0682:128_A>G(K43R)]					S
IM40-4789	Russia	11.4	male	bone	2013	new case	continuation phase	L2.2.1 Beijing B0/W148	MDR	R	rpoB[Rv0667:1349_C>T(S450L)]	rpoB[Rv0667:1349_C>T(S450L)]	wt	wt	R	katG[Rv1908c:944_C>G(S315T)]	wt	wt	wt	wt	wt	R	wt	embB[Rv3795:916_A>G(M306V)]	wt	wt	no data	pncA[Rv2043c:419_C>G(R140P)]			R				ndh[Rv1854c:626_G>A(A209V)]		R				eis_g-10a[IGR_2715333 _2715471:2715342_C>T]	R	rpsL[Rv0682:128_A>G(K43R)]					S
IM41-9059	Russia	2.2	female	vertebrae	2014	new case	continuation phase	L2.2.1 Beijing Central Asian Russian	MDR	R	rpoB[Rv0667:1349_C>T(S450L)]	rpoB[Rv0667:1349_C>T(S450L)]	wt	wt	R	katG[Rv1908c:944_C>G(S315T)]	wt	wt	wt	wt	wt	S	wt	embB[Rv3795:916_A>G(M306V)]	wt	ubiA[Rv3806c:563_A>G(V188A)]	no data	pncA[Rv2043c:389_A>C(V130G)]			S						S					R	rpsL[Rv0682:128_A>G(K43R)]					S
IM42-4244	Russia	4.7	female	vertebrae	2015	new case	continuation phase	L2.2.1 Beijing B0/W148	preXDR	R	rpoB[Rv0667:1349_C>T(S450L)]	rpoB[Rv0667:1349_C>T(S450L)]	wt	wt	R	katG[Rv1908c:944_C>G(S315T)]	wt	wt	wt	wt	wt	S	wt	wt	wt	wt	no data				S		ethA[Rv3854c:1226_A>G(M409T)]				R					R	rpsL[Rv0682:128_A>G(K43R)]					R
IM43-3045	Russia	2.2	male	vertebrae	2015	new case	continuation phase	L4.1.2.1 (Haarlem)	mono resistant	S	wt	wt	wt	wt	R	katG[Rv1908c:944_C>G(S315T)]	wt	wt	wt	wt	wt	S	wt	wt	wt	wt	no data		Rv3236c_g-34c_(Rv3237c_152) [Rv3237c:3613150_C>G]		S						S					R	rpsL[Rv0682:128_A>G(K43R)]					S
IM44-1485	Russia	15.4	male	vertebrae	2015	new case	continuation phase	L2.2.1 Beijing B0/W148	MDR	R	rpoB[Rv0667:1349_C>T(S450L)], rpoB[Rv0667:2480_G>T(R827L)]	rpoB[Rv0667:1349_C>T(S450L)]	wt	wt	R	katG[Rv1908c:944_C>G(S315T)]	wt	wt	wt	wt	wt	R	wt	embB[Rv3795:1217_G>C(G406A)]	wt	wt	no data	pncA[Rv2043c:92_A>C(I31S)]			S						R			rrs_a1401g[rrs:1473246_A>G]		R	rpsL[Rv0682:128_A>G(K43R)]					S
IM45-3825	Russia	3.7	female	vertebrae	2015	new case	continuation phase	L2.2.1 Beijing B0/W148	MDR	R	rpoB[Rv0667:1349_C>T(S450L)]	rpoB[Rv0667:1349_C>T(S450L)]	wt	wt	R	katG[Rv1908c:944_C>G(S315T)]	wt	wt	wt	wt	wt	S	wt	embB[Rv3795:1217_G>C(G406A)]	wt	wt	no data	pncA[Rv2043c:538_C>G(V180L)]			S						R				eis_g-10a[IGR_2715333 _2715471:2715342_C>T]	R	rpsL[Rv0682:128_A>G(K43R)]					S
IM46-5323	Russia	7.3	male	bone	2015	new case	continuation phase	L2.2.1 Beijing B0/W148	MDR	R	rpoB[Rv0667:1349_C>T(S450L)]	rpoB[Rv0667:1349_C>T(S450L)]	wt	wt	R	katG[Rv1908c:944_C>G(S315T)]	wt	wt	wt	wt	wt	R	wt	embB[Rv3795:1490_A>G(Q497R)]	wt	wt	no data	pncA[Rv2043c:199_A>G(S67P)]			S						S					R	rpsL[Rv0682:128_A>G(K43R)]					S
IM47c-4631	Russia	1.2	female	bone	2012	new case	continuation phase	L2.2.1 Beijing B0/W148	MDR	R	rpoB[Rv0667:1349_C>T(S450L)]	rpoB[Rv0667:1349_C>T(S450L)]	wt	wt	R	katG[Rv1908c:944_C>G(S315T)]	wt	wt	wt	wt	wt	S	wt	wt	embA_c-16t[IGR_4243148_4243232:4243217_C>T]	wt	no data	pncA[Rv2043c:35_T>G(D12A)]			S						R				eis_g-10a[IGR_2715333 _2715471:2715342_C>T]	R	rpsL[Rv0682:128_A>G(K43R)]					S
IM48-2528	Russia	2.6	male	bone	2013	new case	continuation phase	L4.4.1.1 (S)	MDR	R	rpoB[Rv0667:1349_C>T(S450L)]	rpoB[Rv0667:1349_C>T(S450L)]	wt	wt	R	katG[Rv1908c:944_C>G(S315T)]	wt	wt	wt	wt	wt	R	wt	embB[Rv3795:1061_A>C(D354A)]	wt	wt	no data				S		ethA[Rv3854c:227_G>T(A76D)]		ndh[Rv1854c:53_A>G(V18A)]		R			rrs_a1401g[rrs:1473246_A>G]		R	rpsL[Rv0682:128_A>G(K43R)]					S
IM49-9890	Russia	5	male	bone	2011	new case	continuation phase	L2.2.1 Beijing Central Asian Russian	MDR	R	rpoB[Rv0667:1349_C>T(S450L)]	rpoB[Rv0667:1349_C>T(S450L)]	wt	wt	R	katG[Rv1908c:944_C>G(S315T)]	wt	wt	wt	wt	wt	R	wt	embB[Rv3795:1217_G>C(G406A)]	wt	wt	S				S		ethA[Rv3854c:770_G>A(P257L)]				S			rrs_a1401g[rrs:1473246_A>G]		R	rpsL[Rv0682:128_A>G(K43R)]					S	gyrA[Rv0006:281_A>G(D94G)]
IM50-5622	Russia	6.1	male	bone	2011	new case	continuation phase	L2.2.1 Beijing Central Asian Russian	susceptible	S	wt	wt	wt	Rv2752c[Rv2752c:301_G>C(P101A)], Rv2752c[Rv2752c:1070_T>G(K357T)]	S	wt					Rv2752c:301_G>C(P101A), Rv2752c:1070_T>G(K357T)	S					no data				S						S					S						S
IM52-263	Russia	2.2	female	vertebrae	2015	new case	continuation phase	L2.2.1 Beijing Central Asian Russian	susceptible	S	wt	wt	wt	wt	S	wt	wt	wt	wt	wt	wt	S	wt	wt	wt	wt	no data				S						S		whiB6_g-42t[IGR_4338522 _4338848:4338563_C>A]			S						S
IM54-1486	Russia	8	female	vertebrae	2018	new case	continuation phase	L2.2.1 Beijing Central Asian Russian	preXDR	R	rpoB[Rv0667:1196_C>T(T399I)], rpoB[Rv0667:1349_C>T(S450L)]	rpoB[Rv0667:1196_C>T(T399I)], rpoB[Rv0667:1349_C>T(S450L)]	wt	wt	R	katG[Rv1908c:944_C>G(S315T)]	wt	wt	wt	wt	wt	S	wt	embB[Rv3795:916_A>G(M306V)]	wt	wt	no data	pncA[Rv2043c:146_T>C(D49G)]			S						S					R	rpsL[Rv0682:128_A>G(K43R)]					R
IM55-5078	Russia	1	female	bone	2016	new case	continuation phase	L2.2.1 Beijing Central Asian Russian	susceptible	S	wt	wt	wt	wt	S	wt	wt	wt	wt	wt	wt	S	wt	wt	wt	wt	no data			PPE35_g-11a [IGR_2170613_2171060:2170623_C>T]	S						S					S						S
IM56-6987	Russia	9.6	male	vertebrae	2016	new case	continuation phase	L2.2.1 Beijing Central Asian Russian	mono resistant	S	wt	wt	wt	Rv2752c[Rv2752c:1461_C>A(L487F)]	R	katG[Rv1908c:944_C>G(S315T)]					Rv2752c:1461_C>A(L487F)	S					no data				S						S			rrs_c1443g[rrs:1473288_C>G]		S						S
IM57-10604	Russia	5.6	male	bone	2016	new case	continuation phase	L2.2.1 Beijing Central Asian Russian	poly resistant	S	wt	wt	wt	wt	R	katG[Rv1908c:944_C>G(S315T)]	wt	wt	wt	wt	wt	S	wt	wt	wt	wt	no data				S						S					R	rpsL[Rv0682:128_A>G(K43R)]					S
IM58-7639	Russia	7.5	male	bone	2017	new case	continuation phase	L2.2.1 Beijing B0/W148	MDR	R	rpoB[Rv0667:1349_C>T(S450L)]	rpoB[Rv0667:1349_C>T(S450L)]	wt	wt	R	katG[Rv1908c:944_C>G(S315T)]	wt	wt	wt	wt	wt	S	wt	embB[Rv3795:1217_G>C(G406A)]	wt	wt	no data	pncA[Rv2043c:539_A>C(V180G)]PZA			S						S				eis_g-10a[IGR_2715333 _2715471:2715342_C>T]	R	rpsL[Rv0682:128_A>G(K43R)]					S
IM59-6535	Russia	1.6	male	joint	2019	new case	continuation phase	L2.2.1 Beijing Central Asian Russian	susceptible	S	wt	wt	wt	wt	S	wt	wt	wt	wt	wt	wt	S	wt	wt	wt	wt	no data			PPE35_g-11a [IGR_2170613_2171060:2170623_C>T]	S						S					S						S
IM60-4545	Russia	1	male	vertebrae	2019	new case	continuation phase	L4.3.3 (LAM)	susceptible	S	wt	wt	wt	wt	S	wt	wt	wt	wt	wt	Rv2752c_c-944t_(dapA_c-11t)[IGR_3067125_3067192:3067135_G>A	S	wt	wt	wt	wt	no data				S						S					S						S
IM61-3828	Russia	0.9	male	vertebrae	2019	new case	continuation phase	L2.2.1 Beijing Central Asian Russian	poly resistant	S	wt	wt	wt	wt	R	katG[Rv1908c:944_C>G(S315T)]	wt	wt	wt	wt	wt	S	wt	wt	wt	wt	no data				S						S					R	rpsL[Rv0682:128_A>G(K43R)]					R	gyrA[Rv0006:280_G>A(D94N)], gyrA[Rv0006:1733_G>A(R578Q)]
IM63-7127	Russia	5.3	male	vertebrae	2018	new case	continuation phase	L2.2.1 Beijing Central Asian Russian	MDR	R	wt	wt	wt	wt	R	katG[Rv1908c:944_C>G(S315T)]	wt	wt	wt	wt	wt	S	wt	embB[Rv3795:916_A>G(M306V)]	wt	wt	no data				S		ethA[Rv3854c:941_G>A(T314I)]				S				eis_c-14t[IGR_2715333 _2715471:2715346_G>A]	R	rpsL[Rv0682:128_A>G(K43R)]					S
IM64-1184	Russia	1.5	male	vertebrae	2016	new case	continuation phase	L2.2.1 Beijing B0/W148	preXDR	R	rpoB[Rv0667:1349_C>T(S450L)]	rpoB[Rv0667:1349_C>T(S450L)]	wt	wt	R	katG[Rv1908c:944_C>G(S315T)]	wt	wt	wt	wt	wt	R	wt	embB[Rv3795:1217_G>C(G406A)]	embA[Rv3794:13_G>A(G5S)	wt	no data	pncA[Rv2043c:359_A>T(L120Q)]			S						R				eis_g-10a[IGR_2715333 _2715471:2715342_C>T]	R	rpsL[Rv0682:128_A>G(K43R)]					R	gyrA[Rv0006:281_A>G(D94G)]
IM65-8193	Russia	0.9	male	bone	2011	new case	continuation phase	L2.2.1 Beijing Central Asian Russian	susceptible	S	wt	wt	wt	wt	S	wt	wt	wt	wt	wt	wt	S	wt	wt	wt	wt	S				S						S					S						S
IM66-6109	Russia	2.7	female	bone	2017	new case	continuation phase	L2.2.1 Beijing Central Asian Russian	MDR	R	rpoB[Rv0667:1349_C>T(S450L)]	rpoB[Rv0667:1349_C>T(S450L)]	wt	wt	R	katG[Rv1908c:944_C>G(S315T)]	wt	fabG1_L203L[Rv1483:1674048_G>A]	wt	wt	wt	S	wt	embB[Rv3795:916_A>G(M306V)]	wt	wt	no data	pncA[Rv2043c:490_A>G(S164P)]			R			inhA_g-154a_(fabG1_L203L) [Rv1483:1674048_G>A]			R		whiB6_g-42t[IGR_4338522 _4338848:4338563_C>A]		eis_c-14t[IGR_2715333 _2715471:2715346_G>A]	S						S
IM67-4554	Russia	6.1	female	joint	2009	new case	continuation phase	L2.2.1 Beijing Central Asian Russian	MDR	R	rpoB[Rv0667:1349_C>T(S450L)]	rpoB[Rv0667:1349_C>T(S450L)]	wt	wt	R	katG[Rv1908c:944_C>G(S315T)]	wt	wt	wt	wt	wt	R	wt	embB[Rv3795:916_A>G(M306V)], embB[Rv3795:1217_G>C(G406A)]	wt	wt	no data				S						S					R	rpsL[Rv0682:128_A>G(K43R)]					S
IM68-10809	Russia	1	female	vertebrae	2018	new case	continuation phase	L2.2.1 Beijing B0/W148	MDR	R	rpoB[Rv0667:1349_C>T(S450L)]	rpoB[Rv0667:1349_C>T(S450L)]	wt	wt	R	katG[Rv1908c:944_C>G(S315T)]	wt	wt	wt	wt	wt	R	wt	embB[Rv3795:1489_C>A(Q497K)]	wt	wt	no data	pncA[Rv2043c:181_T>G(T61P)], pncA[Rv2043c:359_A>T(L120Q)]			S						S				eis_c-12a[IGR_2715333 _2715471:2715344_G>A]	R	rpsL[Rv0682:128_A>G(K43R)]					S
IM69-1167	Russia	6.6	female	vertebrae	2009	new case	continuation phase	L2.2.1 Beijing Central Asian Russian	susceptible	S	wt	wt	wt	wt	S	wt	wt	wt	wt	wt	wt	S	wt	wt	wt	wt	S				S						S					S						S
IM70-8780	Russia	2.6	male	vertebrae	2017	new case	continuation phase	L2.2.1 Beijing Central Asian Russian	MDR	R	rpoB[Rv0667:1349_C>T(S450L)], rpoB[Rv0667:2283_G>C(E761D)	rpoB[Rv0667:1349_C>T(S450L)]	wt	wt	R	katG[Rv1908c:944_C>G(S315T)]	wt	fabG1_L203L[Rv1483:1674048_G>A]	wt	wt	wt	R	wt	embB[Rv3795:1061_A>C(D354A)]	wt	wt	R				R		ethA_t-7c[IGR_4327474_ 4327548:4327480_A>G]	inhA_g-154a_(fabG1_L203L) [Rv1483:1674048_G>A]			S		whiB6_g-42t[IGR_4338522 _4338848:4338563_C>A]		eis_g-37t[IGR_2715333 _2715471:2715369_C>A]	R						S
IM71-630	Russia	2.6	female	bone	2012	new case	continuation phase	L2.2.1 Beijing B0/W148	MDR	R	rpoB[Rv0667:1349_C>T(S450L)]	rpoB[Rv0667:1349_C>T(S450L)]	wt	wt	R	katG[Rv1908c:944_C>G(S315T)]	wt	wt	wt	wt	wt	R	embC[Rv3793:2791_G>A(A931T)]	embB[Rv3795:1490_A>G(Q497R)]	wt	wt	no data				S						R				eis_g-37t[IGR_2715333 _2715471:2715369_C>A]	R	rpsL[Rv0682:128_A>G(K43R)]					S
IM72-8678	Russia	2	male	vertebrae	2012	new case	continuation phase	L2.2.1 Beijing Central Asian Russian	preXDR	R	rpoB[Rv0667:1349_C>T(S450L)]	rpoB[Rv0667:1349_C>T(S450L)]	wt	wt	R	katG[Rv1908c:944_C>G(S315T)]	wt	wt	wt	wt	wt	R	wt	embB[Rv3795:1490_A>G(Q497R)]	wt	wt	no data	pncA[Rv2043c:357_C>A(W119C)]			S		ethA[Rv3854c:842_T>G(H281P)]				R			rrs_a1401g[rrs:1473246_A>G]		R	rpsL[Rv0682:128_A>G(K43R)]					R	gyrA[Rv0006:281_A>G(D94G)]
IM73-1597	Russia	6.8	male	vertebrae	2018	new case	continuation phase	L2.2.1 Beijing Asian Ancestral 2	mono resistant	S	wt	wt	wt	wt	R	katG[Rv1908c:944_C>G(S315T)]	wt	wt	wt	wt	wt	S	wt	wt	wt	wt	no data			PPE35[Rv1918c:1834_T>C(T612A)]	S		ethA[Rv3854c:1000_G>C(P334A)]				S		whiB6[Rv3862c:157_A>G(C53R)]			S			whiB6[Rv3862c:157_A>G(C53R)]			S
IM75-3101	Russia	2.3	male	bone	2020	new case	continuation phase	L2.2.1 Beijing B0/W148	MDR	R	rpoB[Rv0667:1349_C>T(S450L)]	rpoB[Rv0667:1349_C>T(S450L)]	wt	wt	R	katG[Rv1908c:944_C>G(S315T)]	wt	wt	wt	wt	wt	S	wt	embB[Rv3795:918_G>C(M306I)]	wt	wt	no data				S						S					R	rpsL[Rv0682:128_A>G(K43R)]					S
IM76-6630	Russia	9.8	male	vertebrae	2019	new case	continuation phase	L2.2.1 Beijing B0/W148	preXDR	R	rpoB[Rv0667:1349_C>T(S450L)]	rpoB[Rv0667:1349_C>T(S450L)], rpoB[Rv0667:2479_C>T(R827C)]	wt	wt	R	katG[Rv1908c:944_C>G(S315T)]	wt	wt	wt	wt	wt	R	wt	embB[Rv3795:916_A>G(M306V)]	wt	wt	no data	pncA[Rv2043c:488_A>G(V163A)]			R						R			rrs_a1401g[rrs:1473246_A>G]		R	rpsL[Rv0682:128_A>G(K43R)]					R	gyrA[Rv0006:281_A>G(D94G)]
IM77-6686	Russia	10	female	vertebrae	2017	new case	continuation phase	L2.2.1 Beijing B0/W148	MDR	R	rpoB[Rv0667:1349_C>T(S450L)]	rpoB[Rv0667:1349_C>T(S450L)]	wt	wt	R	katG[Rv1908c:944_C>G(S315T)]	wt	fabG1_t-8c [IGR_1673300_1673439:1673432_T>A]	wt	wt	wt	R	wt	embB[Rv3795:916_A>G(M306V)]	wt	wt	no data				R			inhA_t-770c_(fabG1_t-8c)[IGR_1673300_1673439:1673432_T>A]			S					R	rpsL[Rv0682:128_A>G(K43R)]					S
IM78-2924	Russia	5.6	female	bone	2016	new case	continuation phase	L4.1.2.1 (Haarlem)	preXDR	R	wt	wt	wt	wt	R	wt	wt	wt	wt	wt	wt	S	wt	wt	wt	wt	no data				S						R					R						R
IM79-7633	Russia	2.1	male	vertebrae	2020	new case	continuation phase	L2.2.1 Beijing Asian Ancestral 3	poly resistant	S	wt	wt	wt	wt	S	wt	wt	wt	wt	wt	wt	S	wt	wt	wt	ubiA_g-3787a [IGR_4273476_4273738:4273620_C>T]	no data				S		ethA[Rv3854c:798_G>C(S266R)]				S					R	rpsL[Rv0682:128_A>G(K43R)]					R	gyrA[Rv0006:280_G>A(D94N)]
IM80-4292	Russia	2.4	female	bone	20166	new case	continuation phase	L2.2.1 Beijing B0/W148	poly resistant	S	wt	wt	wt	wt	R	katG[Rv1908c:944_C>G(S315T)]	wt	wt	wt	wt	wt	S	wt	wt	wt	wt	no data				S						S					R	rpsL[Rv0682:128_A>G(K43R)]					S
IM81-1918	Russia	3.1	male	bone	2016	new case	continuation phase	L2.2.1 Beijing Central Asian Russian	MDR	R	rpoB[Rv0667:1304_A>G(D435G)], rpoB[Rv0667:1333_C>A(H445N)]	rpoB[Rv0667:1304_A>G(D435G)], rpoB[Rv0667:1333_C>A(H445N)]	wt	wt	R	katG[Rv1908c:944_C>G(S315T)]	wt	wt	wt	wt	wt	S	wt	embB[Rv3795:918_G>C(M306I)]	wt	wt	no data	pncA[Rv2043c:415_C>T(V139M)]			S						S					R	rpsL[Rv0682:128_A>G(K43R)]					S
IM82-4181	Russia	2.7	female	vertebrae	2006	new case	continuation phase	L2.2.1 Beijing B0/W148	MDR	R	rpoB[Rv0667:1349_C>T(S450L)]	rpoB[Rv0667:1349_C>T(S450L)]	wt	wt	R	katG[Rv1908c:944_C>G(S315T)]	wt	wt	wt	wt	wt	R	wt	embB[Rv3795:918_G>C(M306I)]	wt	wt	no data				R						S					R	rpsL[Rv0682:128_A>G(K43R)]					S
IM83-3675	Russia	5	male	vertebrae	2010	new case	continuation phase	L4.1.2	susceptible	S	wt	wt	wt	wt	S	wt	wt	wt	wt	wt	wt	S	wt	wt	wt	wt	no data				R						S	whiB7_g-242c[IGR_3568680 _3569108:3568921_C>G]				S						S
IM84-4599	Russia	4.8	male	vertebrae	2006	new case	continuation phase	L2.2.1 Beijing Central Asian Russian	MDR	R	rpoB[Rv0667:1349_C>T(S450L)]	rpoB[Rv0667:1349_C>T(S450L)]	wt	wt	R	katG[Rv1908c:944_C>G(S315T)]	wt	wt	wt	wt	wt	S	wt	wt	embA_c-16t [IGR_4243148_4243232:4243217_C>T]	wt	no data				S		ethA[Rv3854c:713_A>C(V238G)]				R				eis_g-10a[IGR_2715333 _2715471:2715342_C>T]	R	rpsL[Rv0682:128_A>G(K43R)]					S
IM85-2331	Russia	2.3	male	vertebrae	2008	new case	continuation phase	L2.2.1 Beijing Central Asian Russian	poly resistant	S	wt	wt	wt	wt	R	katG[Rv1908c:944_C>G(S315T)]	wt	wt	wt	wt	wt	S	wt	wt	wt	wt	no data				R		ethA[Rv3854c:619_G>C(R207G)]				S					R	rpsL[Rv0682:128_A>G(K43R)]					S
IM51-3688	Russia	6	female	vertebrae	2007	new case	continuation phase	L4.8	susceptible	S	wt	wt	wt	wt	S	wt	wt	wt	wt	wt	wt	S	wt	wt	wt	wt	no data				S						S					S						S
IM53-5708	Russia	3.4	female	vertebrae	2014	new case	continuation phase	L4.8	susceptible	S	wt	wt	wt	wt	S	wt	wt	wt	wt	wt	wt	S	wt	wt	wt	wt	no data				S						S					S						S
IM62-8134	Russia	2.5	male	joint	2019	new case	continuation phase	L4.8	mono resistant	S	wt	wt	wt	wt	R	katG[Rv1908c:944_C>G(S315T)]	wt	wt	wt	wt	wt	S	wt	wt	wt	wt	no data				S						S					S						S
BJ11072.L350	China	0.8	male	BALF	2011	new case	befrore treatment	L2.2.1 Beijing Asian Ancestral 3	susceptible	S	wt	wt	wt	wt	S	wt	wt	wt	wt	wt	wt	S	wt	wt	wt	wt	no data				No data		ethA[Rv3854c:798_G>C(S266R)]				S					S		rrs_c499t[rrs:1472344_C>T]				S
E120803.L350	China	14	female	Gastric juice	2012	new case	intensive phase	L2.2.1 Beijing Asian Modern 2	MDR	R	rpoB[Rv0667:1304_A>G(D435G)]	rpoB[Rv0667:1304_A>G(D435G)]	wt	wt	R	katG[Rv1908c:944_C>G(S315T)]	wt	wt	wt	wt	wt	S	wt	embB[Rv3795:1060_G>A(D354N)], embB[Rv3795:1687_A>C(I563L)]	wt	wt	no data				No data						S					R	rpsL[Rv0682:263_A>G(K88R)]	rrs_c499t[rrs:1472344_C>T]				S
E120807.L350	China	17	male	pus	2012	no data	befrore treatment	L2.2.1 Beijing Asian African 2	MDR	R	rpoB[Rv0667:1304_A>G(D435G)]	rpoB[Rv0667:1304_A>G(D435G)]	wt	wt	R	katG[Rv1908c:944_C>G(S315T)]	wt	wt	wt	wt	wt	S	wt	wt	wt	wt	no data				No data						S					R	rpsL[Rv0682:128_A>G(K43R)]					S
E120808.L350	China	14	female	sputum	2012	new case	intensive phase	L2.2.1 Beijing Asian Modern 2	mDR	R	rpoB[Rv0667:1304_A>G(D435G)]	rpoB[Rv0667:1304_A>G(D435G)]	wt	wt	R	katG[Rv1908c:944_C>G(S315T)]	wt	wt	wt	wt	wt	S	wt	embB[Rv3795:1060_G>A(D354N)], embB[Rv3795:1687_A>C(I563L)]	wt	wt	no data				No data						S					R	rpsL[Rv0682:263_A>G(K88R)]					S
E120811.L350	China	14	female	gastric juice	2012	new case	intensive phase	L4.5 (RD122)	susceptible	S	wt	wt	wt	wt	S	wt	wt	wt	wt	wt	wt	S	wt	wt	wt	wt	no data				No data						S					S		rrs_c499t[rrs:1472344_C>T]				S
E120815.L350	China	3	female	BALF	2012	new case	befrore treatment	L2.2.1.1 Beijing Asian Modern 3.2 (Pacific RD150)	susceptible	S	wt	wt	wt	wt	S	wt	wt	wt	wt	wt	wt	S	wt	wt	wt	wt	no data				No data						S					S						S
E120830.L350	China	0.2	male	gastric juice	2012	new case	intensive phase	L2.2.1 Beijing Asian Modern 2	susceptible	S	wt	wt	wt	wt	S	wt	wt	wt	wt	wt	wt	S	wt	wt	wt	wt	no data				No data						S					S						S
E121003.L350	China	12	male	Gastric juice	2012	new case	befrore treatment	L2.2.1 Beijing Asian Modern 1	susceptible	S	wt	wt	wt	wt	S	wt	wt	wt	wt	wt	wt	S	wt	wt	wt	wt	no data				No data						S			rrs_c380g[rrs:1472225_C>A]		S		rrs_c499t[rrs:1472344_C>T]				S
E121008.L350	China	12	male	pleural effusion	2012	new case	intensive phase	L2.2.1 Beijing Asian Modern 1	susceptible	S	wt	wt	wt	wt	S	wt	wt	wt	wt	wt	wt	S	wt	wt	wt	wt	no data				No data						S					S						S
E121016.L350	China	2	male	sputum	2012	no data	befrore treatment	L4.5 (RD122)	mono resistant	S	wt	wt	wt	wt	S	katG[Rv1908c:329_G>A(A110V)]	wt	fabG1_c-15t [IGR_1673300_1673439:1673425_C>T]	wt	wt	wt	S	wt	wt	wt	wt	no data				No data			inhA_c-777t_(fabG1_c-15t) [IGR_1673300_1673439:1673425_C>T]			S					R	rpsL[Rv0682:128_A>G(K43R)]					S
E121017.L350	China	10	male	BALF	2012	new case	befrore treatment	L2.2.1 Beijing Asian Modern 2	susceptible	S	wt	wt	wt	wt	S	wt	wt	wt	wt	wt	wt	S	wt	wt	wt	wt	no data				No data						S					S						S
E121019.L350	China	0.5	male	Gastric juice	2012	new case	befrore treatment	L4.4.2	susceptible	S	wt	wt	wt	wt	S	wt	wt	wt	wt	wt	wt	S	wt	wt	wt	wt	no data				No data			aftB_c-92t_(ubiA_302) [Rv3806c:4268928_G>A]			S					S						S
E121026.L350	China	0.3	male	blood	2012	new case	befrore treatment	L2.2.1 Beijing Asian African 2	MDR	R	rpoB[Rv0667:1304_A>G(D435G)]	rpoB[Rv0667:1304_A>G(D435G)]	wt	wt	R	katG[Rv1908c:944_C>G(S315T)]	wt	wt	wt	wt	wt	S	wt	wt	wt	wt	no data				No data						S			rrs_a493g[rrs:1472338_A>C]		R	rpsL[Rv0682:128_A>G(K43R)]					S
E121114.L350	China	0.5	female	pus	2012	new case	intensive phase	L2.2.1.1 Beijing Asian Modern 3.2 (Pacific RD150)	susceptible	S	wt	wt	wt	wt	S	wt	wt	wt	wt	wt	wt	S	wt	wt	wt	wt	no data				No data						S					S						S
E130204.L350	China	0.2	male	BALF	2013	new case	intensive phase	L2.2.1 Beijing Asian Modern 4	susceptible	S	wt	wt	wt	wt	S	wt	wt	wt	wt	wt	wt	S	wt	wt	wt	wt	no data				No data						S			rrs_c380g[rrs:1472225_C>A]		S		rrs_c499t[rrs:1472344_C>T]				S
E130206.L350	China	0.3	female	Gastric juice	2013	new case	befrore treatment	L2.2.1 Beijing Asian Modern 4	susceptible	S	wt	wt	wt	wt	S	wt	wt	wt	wt	wt	wt	S	wt	wt	wt	wt	no data				No data						S			rrs_c380g[rrs:1472225_C>A]		S		rrs_c499t[rrs:1472344_C>T]				S
E130217.L350	China	1.8	male	BALF	2013	new case	befrore treatment	L2.2.1 Beijing Asian Modern 1	susceptible	S	wt	wt	wt	wt	S	wt	wt	wt	wt	wt	wt	S	wt	embB[Rv3795:2116_C>T(P706S)]	wt	wt	no data				No data						S			rrs_a493g[rrs:1472338_A>C]		S						S
E130416.L350	China	1.6	male	Gastric juice	2013	new case	befrore treatment	L2.2.1 Beijing Asian Modern 4	susceptible	S	wt	wt	wt	wt	S	wt	wt	wt	wt	wt	wt	S	wt	wt	wt	wt	no data				No data						S					S						S
E130514.L350	China	11.9	male	BALF	2013	new case	intensive phase	L2.2.1 Beijing Asian African 2	mono resistant	S	wt	wt	wt	wt	S	wt	wt	wt	wt	wt	wt	S	embC_g-387t_(aftA_515) [Rv3792:4239476_G>T]	wt	wt	wt	no data				No data						S			rrs_c380g[rrs:1472225_C>A], rrs_a493g[rrs:1472338_A>C]		R	rpsL[Rv0682:263_A>G(K88R)]	rrs_c499t[rrs:1472344_C>T]				S
E130702.L350	China	6.4	female	Gastric juice	2013	new case	befrore treatment	L4.5 (RD122)	mono resistant	S	wt	wt	wt	wt	R	katG[Rv1908c:944_C>G(S315T)]	wt	wt	wt	wt	wt	S	wt	wt	wt	wt	no data				No data			aftB_c-92t_(ubiA_302) [Rv3806c:4268928_G>A]			S					S						S
E130713.L350	China	0.7	male	Gastric juice	2013	new case	befrore treatment	L2.2.2 Beijing Asian Ancestral 1	susceptible	S	wt	wt	wt	wt	S	wt	wt	wt	wt	wt	wt	S	wt	wt	wt	wt	no data				No data						S					S		rrs_c499t[rrs:1472344_C>T]				S
E130726.L350	China	2.7	male	CSF	2013	new case	befrore treatment	L2.2.1 Beijing Asian African 1	susceptible	S	wt	wt	wt	wt	S	wt	wt	wt	wt	wt	wt	S	wt	wt	wt	wt	no data				No data	mshA_c-66t_(Rv0485_433) [Rv0485:575282_C>T]					S		whiB6_t-79c[IGR_4338522 _4338848:4338600_A>G]			S						S
E130802.L350	China	9.4	male	CSF	2013	new case	befrore treatment	L2.2.1 Beijing Asian Modern 2	MDR	R	rpoB[Rv0667:1349_C>T(S450L)]	rpoB[Rv0667:1349_C>T(S450L)]	wt	wt	R	katG[Rv1908c:944_C>G(S315T)]	wt	wt	wt	wt	wt	R	wt	embB[Rv3795:916_A>G(M306V)]	wt	wt	no data	pncA_a-11g [IGR_2289242_2289281:2289252_T>C]	Rv3236c_c-365g_(Rv3237c_41) [Rv3237c:3613481_G>C]		No data						S					R	rpsL[Rv0682:128_A>G(K43R)]					S
E130823.L350	China	0.3	male	Gastric juice	2013	new case	befrore treatment	L2.2.1 Beijing Asian Modern 2	susceptible	S	wt	wt	wt	wt	S	wt	wt	wt	wt	wt	wt	S	wt	wt	wt	wt	no data				No data						S					S						S
E130824.L350	China	0.3	male	Gastric juice	2013	new case	intensive phase	L2.2.1 Beijing Asian Modern 1	susceptible	S	wt	wt	wt	wt	S	wt	wt	wt	wt	wt	wt	S	wt	wt	wt	wt	no data				No data						S					S						S
E1308275.L350	China	15	male	pleural effusion	2013	new case	befrore treatment	L2.2.2 Beijing Asian Ancestral 1	susceptible	S	wt	wt	wt	wt	S	wt	wt	wt	wt	wt	wt	S	wt	wt	wt	wt	no data				No data						S					S						S
E130905.L350	China	2.2	female	Gastric juice	2013	new case	intensive phase	L2.2.1 Beijing Asian Ancestral 2	susceptible	S	wt	wt	wt	wt	S	wt	wt	wt	wt	wt	wt	S	wt	wt	wt	wt	no data				No data		ethA[Rv3854c:1000_G>C(P334A)]				S					S		rrs_c499t[rrs:1472344_C>T]				S
E130912.L350	China	0.4	male	Gastric juice	2013	new case	intensive phase	L2.2.1 Beijing Asian Modern 2	susceptible	S	wt	wt	rpoC[Rv0668:1330_C>T(P444S)]	wt	S	wt	wt	wt	wt	wt	wt	S	wt	wt	wt	wt	no data				No data						S					S		rrs_c499t[rrs:1472344_C>T]				S
E130926.L350	China	2	female	BALF	2013	new case	befrore treatment	L2.2.1 Beijing Asian Modern 2	susceptible	S	wt	wt	wt	wt	S	wt	wt	wt	wt	wt	wt	S	wt	wt	wt	wt	no data				No data						S					S						S
E1310041.L350	China	1	female	Gastric juice	2013	new case	befrore treatment	L2.2.1 Beijing Asian African 2	mono resistant	S	wt	wt	wt	wt	S	wt	wt	wt	wt	wt	Rv2752c_t-10c [IGR_3066192_3066221:3066201_A>G]	S	wt	wt	wt	wt	no data				No data						S					S						R	gyrA[Rv0006:281_A>G(D94G)]
E131015.L350	China	4.9	male	BALF	2013	new case	intensive phase	L2.2.1 Beijing Asian Modern 1	mono resistant	S	wt	wt	wt	wt	S	wt	wt	wt	wt	Rv1258c:1088_C>A(G363V)	wt	S	wt	wt	wt	wt	no data				No data						S			rrs_a514t[rrs:1472359_A>C]		R		rrs_a514t[rrs:1472359_A>C]				S
E131020.L350	China	5	male	pleural effusion	2013	new case	befrore treatment	L2.2.1 Beijing Asian Modern 1	susceptible	S	wt	wt	wt	wt	S	wt	wt	wt	wt	wt	wt	S	wt	wt	wt	wt	no data				No data						S					S						S
E131102.L350	China	0.3	female	Gastric juice	2013	new case	intensive phase	L2.2.1 Beijing Asian Ancestral 2	susceptible	S	wt	wt	wt	wt	S	wt	wt	wt	wt	wt	wt	S	wt	wt	wt	wt	no data				No data		ethA[Rv3854c:798_G>C(S266R)]				S					S						S
E131119.L350	China	0.25	female	BALF	2013	new case	intensive phase	L2.2.1 Beijing Asian Ancestral 2	susceptible	S	wt	wt	wt	wt	S	wt	wt	wt	wt	wt	wt	S	wt	wt	wt	wt	no data				No data		ethA[Rv3854c:798_G>C(S266R)]				S					S						S
E140122.L350	China	11.4	female	Gastric juice	2014	new case	intensive phase	L2.2.1 Beijing Asian Ancestral 3	poly resistant	S	wt	wt	wt	wt	R	katG[Rv1908c:944_C>G(S315T)]	wt	wt	wt	wt	wt	S	wt	wt	wt	wt	no data				No data		ethA[Rv3854c:798_G>C(S266R)]				S			rrs_c380g[rrs:1472225_C>A]		R	rpsL[Rv0682:128_A>G(K43R)]	rrs_c499t[rrs:1472344_C>T]				R	gyrA[Rv0006:281_A>G(D94G)]
E140307.L350	China	0.91	male	BALF	2014	new case	befrore treatment	L2.2.1 Beijing Asian African 1	susceptible	S	wt	wt	wt	wt	S	wt	wt	wt	wt	wt	wt	S	wt	wt	wt	wt	no data				No data						S					S						S
E140312.L350	China	6.3	female	blood	2014	new case	befrore treatment	L2.2.1 Beijing Asian Modern 2	susceptible	S	wt	wt	wt	wt	S	wt	wt	wt	wt	wt	wt	S	wt	wt	wt	wt	no data				No data						S					S						S
E140401.L350	China	13	female	BALF	2014	new case	intensive phase	L2.2.1 Beijing Asian African 2	susceptible	S	wt	wt	rpoC[Rv0668:2165_A>G(Y722C)]	wt	S	wt	wt	wt	wt	wt	wt	S	wt	wt	wt	wt	no data				No data						S		whiB6_t-191c[IGR_4338522 _4338848:4338712_A>G]			S						S
E140421.L350	China	1	female	BALF	2014	new case	intensive phase	L2.2.1 Beijing Asian Modern 2	susceptible	S	wt	wt	wt	wt	S	wt	wt	wt	wt	wt	wt	S	wt	wt	wt	wt	no data				No data						S					S						S
E140519.L350	China	0.3	male	BALF	2014	new case	intensive phase	L2.2.1 Beijing Asian Modern 2	susceptible	S	wt	wt	wt	wt	S	wt	wt	wt	wt	wt	wt	S	wt	wt	wt	wt	no data				No data						S			rrs_a335c[rrs:1472180_A>G]		S		rrs_t1360c[rrs:1473205_T>C]				S
E140523.L350	China	9.83	male	Gastric juice	2014	new case	befrore treatment	L2.2.1 Beijing Asian Modern 2	susceptible	S	wt	wt	wt	wt	S	wt	wt	wt	wt	wt	wt	S	wt	wt	wt	wt	no data				No data						S					S						S
E140524.L350	China	5.58	male	blood	2014	new case	befrore treatment	L2.2.1 Beijing Asian Modern 2	susceptible	S	wt	wt	wt	wt	S	wt	wt	wt	wt	wt	wt	S	wt	wt	wt	wt	no data				No data						S					S						S
E140530.L350	China	0.75	female	BALF	2014	new case	intensive phase	L4.4.2	susceptible	S	wt	wt	wt	wt	S	wt	wt	wt	wt	wt	wt	S	wt	wt	wt	wt	no data				No data			aftB_c-92t_(ubiA_302) [Rv3806c:4268928_G>A]			S					S						S
E140628.L350	China	0.17	female	Gastric juice	2014	new case	intensive phase	L2.2.1 Beijing Asian African 2	susceptible	S	wt	wt	wt	wt	S	wt	wt	wt	wt	wt	wt	S	wt	wt	wt	wt	no data				No data						S					S						S
E140630.L350	China	7.17	male	CSF	2014	new case	intensive phase	L2.2.1 Beijing Asian Modern 2	MDR	R	rpoB[Rv0667:1289_T>C(L430P)]	rpoB[Rv0667:1289_T>C(L430P)]	wt	wt	R	katG[Rv1908c:944_C>G(S315T)]	wt	wt	wt	wt	wt	S	wt	embB[Rv3795:1687_A>C(I563L)]	wt	wt	no data				No data						S			rrs_a493g[rrs:1472338_A>C]		S						S
E140705.L350	China	13.2	female	Gastric juice	2014	new case	befrore treatment	L2.2.1 Beijing Asian African 2	susceptible	S	wt	wt	wt	wt	S	wt	wt	wt	wt	wt	wt	S	wt	wt	wt	wt	no data				No data						S					S						S
E140714.L350	China	0.75	male	BALF	2014	new case	intensive phase	L2.2.1 Beijing Asian African 2	susceptible	S	wt	wt	wt	wt	S	wt	wt	wt	wt	wt	wt	S	wt	wt	wt	wt	no data				No data						S			rrs_c380g[rrs:1472225_C>A]		S		rrs_c499t[rrs:1472344_C>T]				S
E140731.L350	China	4.75	male	BALF	2014	new case	intensive phase	L2.2.1 Beijing Asian Modern 2	susceptible	S	wt	wt	wt	wt	S	wt	wt	wt	wt	wt	wt	S	wt	wt	embA[Rv3794:2503_G>A(A835T)]	wt	no data				No data						S					S						S
E140806.L350	China	0.42	male	BALF	2014	new case	befrore treatment	L2.2.1 Beijing Asian Modern 2	susceptible	S	wt	wt	wt	wt	S	wt	wt	wt	wt	wt	wt	S	wt	wt	wt	wt	no data				No data						S					S						S
E140809.L350	China	1.91	male	Gastric juice	2014	new case	intensive phase	L2.2.1 Beijing Asian Modern 2	mono resistant	S	wt	wt	wt	wt	S	wt	wt	wt	wt	wt	wt	S	wt	wt	wt	wt	no data				No data						S					S						R	gyrA[Rv0006:271_T>C(S91P)]
E140814.L350	China	0.33	male	BALF	2014	new case	intensive phase	L2.2.1 Beijing Asian Ancestral 3	susceptible	S	rpoB_c-44t [IGR_759310_759806:759763_C>T]	wt	wt	wt	S	wt	wt	wt	wt	wt	wt	S	wt	wt	wt	wt	no data				No data		ethA[Rv3854c:798_G>C(S266R)]				S					S						S
E140823.L350	China	0.17	male	Gastric juice	2014	new case	befrore treatment	L2.2.1 Beijing Asian Ancestral 2	susceptible	S	wt	wt	wt	wt	S	wt	wt	wt	wt	wt	wt	S	wt	wt	wt	wt	no data				No data		ethA[Rv3854c:1000_G>C(P334A)]				S			rrs_c380g[rrs:1472225_C>A]		S	rpsL[Rv0682:128_A>G(K43R)]	rrs_c499t[rrs:1472344_C>T]				S
E140901.L350	China	0.17	female	BALF	2014	new case	intensive phase	L2.2.1 Beijing Asian Ancestral 2	mono resistant	s	wt	wt	wt	wt	s	wt	wt	wt	wt	wt	wt	s	wt	wt	wt	wt	no data				No data		ethA[Rv3854c:1000_G>C(P334A)]				s					R	rpsL[Rv0682:128_A>G(K43R)]					s
E140920.L350	China	11.58	male	blood	2014	new case	befrore treatment	L2.2.1 Beijing Asian African 2	MDR	R	rpoB[Rv0667:1202_A>G(Q401R)], rpoB[Rv0667:1349_C>T(S450L)]	rpoB[Rv0667:1202_A>G(Q401R)], rpoB[Rv0667:1349_C>T(S450L)]	wt	Rv2752c[Rv2752c:256_G>A(H86Y)	R	katG[Rv1908c:944_C>G(S315T)]					Rv2752c:256_G>A(H86Y)	R					no data				No data											S	rpsL[Rv0682:128_A>G(K43R)]					S	gyrA[Rv0006:281_A>G(D94G)]
E140923.L350	China	11	female	BALF	2014	new case	befrore treatment	L2.2.1 Beijing Asian Modern 2	MDR	R	wt	wt	wt	wt	R	wt	wt	wt	wt	wt	wt	S	wt	wt	wt	wt	no data				No data						S					S						S
E141124.L350	China	0.91	male	BALF	2014	new case	intensive phase	L2.2.1 Beijing Asian African 2	susceptible	S	wt	wt	wt	wt	S	wt	wt	wt	wt	wt	wt	S	wt	wt	wt	wt	no data				No data						S					S						S
E141127.L350	China	0.17	male	Gastric juice	2014	new case	befrore treatment	L2.2.1 Beijing Asian Modern 1	susceptible	S	wt	wt	wt	wt	S	wt	wt	wt	wt	wt	wt	S	wt	wt	wt	wt	no data				No data						S					S						S
E141128.L350	China	0.17	female	Gastric juice	2014	new case	intensive phase	L2.2.1 Beijing Asian African 2	mono resistant	S	wt	wt	rpoC[Rv0668:689_C>T(A230V)]	wt	S	wt	wt	wt	wt	wt	wt	S	wt	wt	wt	wt	no data				No data						S					R	rpsL[Rv0682:128_A>G(K43R)]					S
E141224.L350	China	0.5	female	BALF	2014	new case	befrore treatment	L4.4.2	susceptible	S	wt	wt	wt	wt	S	katG[Rv1908c:49_T>C(S17G)]	wt	wt	wt	wt	wt	S	wt	wt	wt	wt	no data				No data			aftB_c-92t_(ubiA_302) [Rv3806c:4268928_G>A]			S					S						S
E141226.L350	China	12.1	male	Gastric juice	2014	new case	intensive phase	L2.2.1 Beijing Asian Modern 3.1	susceptible	S	rpoB[Rv0667:85_G>A(A29T)]	wt	wt	wt	S	wt	wt	wt	wt	wt	wt	S	wt	wt	wt	wt	no data				No data						S					S		rrs_c499t[rrs:1472344_C>T]				S
E150120.L350	China	6.2	male	CSF	2015	new case	befrore treatment	L2.2.1 Beijing Asian Ancestral 3	susceptible	S	wt	wt	wt	wt	S	wt	wt	wt	wt	wt	wt	S	wt	wt	wt	wt	no data				No data		ethA[Rv3854c:798_G>C(S266R)]				S					S			whiB6[Rv3862c:128_G>A(T43M)]			S
E150127.L350	China	0.3	female	Gastric juice	2015	new case	intensive phase	L2.2.1 Beijing Asian Ancestral 3	susceptible	S	wt	wt	wt	wt	S	wt	wt	wt	wt	wt	wt	S	embC[Rv3793:2920_G>T(V974L)]	wt	wt	wt	no data				No data		ethA[Rv3854c:798_G>C(S266R)]				S			rrs_a736t[rrs:1472581_A>T], rrs_c1300t[rrs:1473145_C>T], rrs_c1328t[rrs:1473173_C>T], rrs_c1346t[rrs:1473191_C>T], rrs_c306t[rrs:1472151_C>T], rrs_c380g[rrs:1472225_C>A], rrs_c699t[rrs:1472544_C>A], rrs_g1190a[rrs:1473035_G>A], rrs_g1302a[rrs:1473147_G>T], rrs_c380g[rrs:1472225_C>A],rrs_g319a[rrs:1472164_G>A], rrs_g358a[rrs:1472203_G>A], rrs_g673a[rrs:1472518_G>T], rrs_t1327g[rrs:1473172_T>C], rr…		S		rrs_c1319a[rrs:1473164_C>A], rrs_g769a[rrs:1472614_G>T], rrs_g1303a[rrs:1473148_G>A], rrs_a700c[rrs:1472545_A>T]				S
E150130.L350	China	6.17	male	Gastric juice	2015	new case	intensive phase	L2.2.1 Beijing Asian Modern 2	susceptible	S	wt	wt	wt	wt	S	wt	wt	wt	wt	wt	wt	S	wt	wt	wt	wt	no data				No data											S						S
E150211.L350	China	0.3	male	BALF	2015	new case	intensive phase	L4.5 (RD122)	susceptible	S	wt	wt	wt	wt	S	wt	wt	wt	wt	Rv1258c[Rv1258c:1240_G>A(P414S)]	wt	S	wt	wt	wt	wt	no data				No data						S				eis[Rv2416c:563_C>G(G188A)	S						S
E150213.L350	China	13.2	female	Gastric juice	2015	new case	intensive phase	L2.2.1 Beijing Asian Modern 3.1	susceptible	S	wt	wt	wt	wt	S	wt	wt	wt	wt	wt	wt	S	wt	wt	wt	wt	no data				No data						S			rrs_c1001a[rrs:1472846_C>G]		S		rrs_c499t[rrs:1472344_C>T]		whiB7_c-252t[IGR_3568680_3569108:3568931_G>A]		S
E150222.L350	China	1.2	female	BALF	2015	new case	intensive phase	L2.2.1 Beijing Asian Modern 2	MDR	R	rpoB[Rv0667:1349_C>T(S450L)]	rpoB[Rv0667:1349_C>T(S450L)]	wt	wt	R	katG[Rv1908c:944_C>G(S315T)]	wt	wt	wt	wt	wt	R	wt	embB[Rv3795:1217_G>C(G406A)]	wt	wt	no data	pncA[Rv2043c:188_T>C(D63G)]			No data						S			rrs_a514t[rrs:1472359_A>C]		S		rrs_a514t[rrs:1472359_A>C]				S	gyrA[Rv0006:2183_C>T(S728L)]
E150227.L350	China	1.17	male	BALF	2015	new case	intensive phase	L2.2.1 Beijing Asian Modern 2	susceptible	S	wt	wt	wt	wt	S	wt	wt	wt	wt	wt	wt	S	wt	wt	embA [Rv3794:3214_G>A(A1072T)]	wt	no data				No data						S			rrs_a1401g[rrs:1473246_A>G],rrs_a493g[rrs:1472338_A>C]		S		rrs_c499t[rrs:1472344_C>T]				S	gyrA[Rv0006:271_T>C(S91P)]
E150315.L350	China	1.75	male	sputum	2015	new case	befrore treatment	L2.2.1 Beijing Asian Modern 4	susceptible	S	wt	wt	wt	wt	S	wt	wt	fabG1_c-15t [IGR_1673300_1673439:1673425_C>T]	wt	wt	wt	S	wt	wt	wt	wt	no data				No data			inhA_c-777t_(fabG1_c-15t) [IGR_1673300_1673439:1673425_C>T]								S						S
E150326.L350	China	5.5	male	CSF	2015	new case	intensive phase	L2.2.1 Beijing Asian Modern 3.1	preXDR	R	rpoB[Rv0667:1349_C>T(S450L)]	rpoB[Rv0667:1349_C>T(S450L)]	wt	wt	R	katG[Rv1908c:944_C>G(S315T)]	wt	wt	wt	wt	wt	S	wt	embB[Rv3795:918_G>C(M306I)]	wt	wt	no data				No data						S			rrs_a493g[rrs:1472338_A>C]		R	rpsL[Rv0682:263_A>G(K88R)]					R	gyrA[Rv0006:281_A>G(D94G)]
E1504211.L350	China	8	female	BALF	2015	new case	intensive phase	L2.2.1.1 Beijing Asian Modern 3.2 (Pacific RD150)	susceptible	S	wt	wt	wt	wt	S	wt	wt	wt	wt	wt	wt	S	wt	wt	wt	wt	no data				No data						S			rrs_c380g[rrs:1472225_C>A]		S		rrs_c499t[rrs:1472344_C>T]				S
E1504229.L350	China	7.6	male	pleural effusion	2015	new case	befrore treatment	L2.2.1 Beijing Asian Modern 3.1	susceptible	S	wt	wt	wt	wt	S	wt	wt	wt	wt	wt	wt	S	wt	wt	wt	wt	no data				No data						S					S						S
E150503.L350	China	15.2	female	Gastric juice	2015	new case	intensive phase	L2.2.1 Beijing Asian African 2	susceptible	S	wt	wt	wt	wt	S	wt	wt	wt	wt	wt	wt	S	wt	wt	wt	wt	no data				No data						S			rrs_c380g[rrs:1472225_C>A]		S		rrs_c499t[rrs:1472344_C>T]				S
E150708.L350	China	3.4	male	CSF	2015	new case	befrore treatment	L2.2.1.1 Beijing Asian Modern 3.2 (Pacific RD150)	susceptible	S	wt	wt	wt	wt	S	wt	wt	wt	wt	wt	wt	S	wt	embB[Rv3795:2606_A>G(D869G)]	wt	wt	no data				No data						S			rrs_a493g[rrs:1472338_A>C]		S						S
E150813.L350	China	13	female	BALF	2015	new case	intensive phase	L2.2.2 Beijing Asian Ancestral 1	susceptible	S	wt	wt	wt	wt	S	wt	wt	wt	wt	wt	wt	S	embC[Rv3793:159_C>G(N53K)]	wt	wt	wt	no data				No data						S			rrs_a493g[rrs:1472338_A>C]		S						S
E1509191.L350	China	7.6	male	CSF	2015	no data	no data	L2.2.1 Beijing Asian African 2	susceptible	S	rpoB[Rv0667:1334_A>G(H445R)]	rpoB[Rv0667:1334_A>G(H445R)]	wt	wt	S	wt	wt	wt	wt	wt	wt	S	wt	wt	wt	wt	no data				No data						S		whiB6_c-183g[IGR_4338522 _4338848:4338704_G>C]	rrs_a493g[rrs:1472338_A>C]		S						S
E1509247.L350	China	5.33	female	BALF	2015	new case	befrore treatment	L2.2.1 Beijing Asian Modern 2	susceptible	S	wt	wt	wt	wt	S	wt	wt	wt	wt	wt	wt	S	wt	wt	wt	wt	no data				No data						S			rrs_a493g[rrs:1472338_A>C]		S		rrs_c499t[rrs:1472344_C>T]				S
E1509259.L350	China	1.5	male	BALF	2015	new case	befrore treatment	L2.2.1 Beijing Asian Modern 2	susceptible	S	wt	wt	wt	wt	S	wt	wt	wt	wt	wt	wt	S	wt	wt	wt	wt	no data				No data						S			rrs_a493g[rrs:1472338_A>C]		S		rrs_c499t[rrs:1472344_C>T]				S
E1511203.L350	China	0.67	male	BALF	2015	new case	intensive phase	L2.2.2 Beijing Asian Ancestral 1	susceptible	S	wt	wt	wt	Rv2752c[Rv2752c:1081_T>C(R361G)]	S	wt					Rv2752c[Rv2752c:1081_T>C(R361G)	S					no data				No data						S					S		rrs_c499t[rrs:1472344_C>T]				S
E1512148.L350	China	5.33	male	BALF	2015	new case	intensive phase	L2.2.1 Beijing Asian Modern 2	susceptible	S	wt	wt	wt	wt	S	wt	wt	wt	wt	wt	wt	S	wt	wt	wt	wt	no data				No data						S			rrs_c380g[rrs:1472225_C>A], rrs_a493g[rrs:1472338_A>C]		S		rrs_c499t[rrs:1472344_C>T]				S
E1601081.L350	China	11.58	female	sputum	2016	no data	befrore treatment	L2.2.1 Beijing Asian Ancestral 3	susceptible	S	wt	wt	wt	wt	S	wt	wt	wt	wt	wt	wt	S	wt	wt	wt	wt	no data				No data		ethA[Rv3854c:798_G>C(S266R)]				S					S		rrs_c499t[rrs:1472344_C>T]				S
E1601131.L350	China	0.17	female	Gastric juice	2016	new case	befrore treatment	L2.2.1 Beijing Asian Ancestral 3	susceptible	S	wt	wt	wt	wt	S	wt	wt	wt	wt	wt	wt	S	wt	wt	wt	wt	no data				No data		ethA[Rv3854c:798_G>C(S266R)]				S					S		rrs_c499t[rrs:1472344_C>T]				S
E1601152.L350	China	15.92	male	Gastric juice	2016	new case	befrore treatment	L2.2.1 Beijing Asian Modern 2	susceptible	S	wt	wt	wt	wt	S	wt	wt	wt	wt	wt	wt	S	wt	wt	wt	wt	no data				No data						S			rrs_c380g[rrs:1472225_C>A], rrs_a493g[rrs:1472338_A>C]		S		rrs_c499t[rrs:1472344_C>T]				S
E1601182.L350	China	0.17	male	Gastric juice	2016	new case	intensive phase	L2.2.1 Beijing Asian Ancestral 3	poly resistant	S	wt	wt	wt	wt	R	katG[Rv1908c:944_C>G(S315T)]	wt	wt	wt	wt	wt	S	wt	wt	wt	wt	no data				No data		ethA[Rv3854c:798_G>C(S266R)]				S			rrs_a514t[rrs:1472359_A>C], rrs_a493g[rrs:1472338_A>C]		R		rrs_c499t[rrs:1472344_C>T]				S
E1602061.L350	China	0.83	female	Gastric juice	2016	new case	intensive phase	L2.2.2 Beijing Asian Ancestral 1	susceptible	S	wt	wt	wt	wt	S	wt	wt	wt	wt	wt	wt	S	embC_g-242a_(aftA_564) [Rv3792:4239621_G>A], embC_g-497a_(aftA_479)[Rv3792:4239366_G>A]	wt	wt	wt	no data				No data						S			rrs_a493g[rrs:1472338_A>C]		S		rrs_c499t[rrs:1472344_C>T], rrs_a514t[rrs:1472359_A>C], rrs_a514t[rrs:1472359_A>C], rrs_c499t[rrs:1472344_C>T]				S
E1602062.L350	China	1.25	female	Gastric juice	2016	new case	intensive phase	L2.2.1 Beijing Asian Modern 2	susceptible	S	wt	wt	wt	wt	S	wt	wt	wt	wt	wt	wt	S	wt	wt	wt	wt	no data				No data						S			rrs_c380g[rrs:1472225_C>A]		S		rrs_c499t[rrs:1472344_C>T]				S
E1603103.L350	China	9	female	BALF	2016	new case	befrore treatment	L2.2.1 Beijing Asian African 2	susceptible	S	wt	wt	wt	wt	S	wt	wt	wt	wt	wt	wt	S	wt	wt	wt	wt	no data				No data						S			rrs_a493g[rrs:1472338_A>C]		S		rrs_c499t[rrs:1472344_C>T]				S
E1603105.L350	China	11.41	male	BALF	2016	new case	intensive phase	L2.2.1 Beijing Asian African 2	susceptible	S	wt	wt	wt	wt	S	wt	wt	wt	wt	wt	wt	S	wt	wt	wt	wt	no data				No data						S			rrs_c380g[rrs:1472225_C>A]		S		rrs_c499t[rrs:1472344_C>T]				S
E1603152.L350	China	15.92	female	urine	2016	new case	intensive phase	L2.2.1 Beijing Asian Modern 2	susceptible	S	wt	wt	wt	wt	S	wt	wt	wt	wt	wt	wt	S	wt	wt	wt	wt	no data				No data						S			rrs_c380g[rrs:1472225_C>A], rrs_a493g[rrs:1472338_A>C]		S		rrs_c499t[rrs:1472344_C>T]				S
E1604266.L350	China	1.92	female	CSF	2016	new case	intensive phase	L2.2.1 Beijing Asian African 2	susceptible	S	wt	wt	wt	wt	S	wt	wt	wt	wt	wt	wt	S	wt	wt	wt	wt	no data				No data						S			rrs_a493g[rrs:1472338_A>C]		S						S
E1606041.L350	China	0.03	female	Gastric juice	2016	no data	befrore treatment	L2.2.1 Beijing Asian Modern 2	susceptible	S	wt	wt	wt	wt	S	wt	wt	wt	wt	wt	wt	S	wt	wt	wt	wt	no data				No data						S			rrs_a493g[rrs:1472338_A>C]		/		rrs_c499t[rrs:1472344_C>T]				S
E1606126.L350	China	0.83	female	CSF	2016	new case	intensive phase	L2.2.1 Beijing Asian Modern 3.1	mono resistant	S	wt	wt	wt	wt	S	wt	wt	wt	wt	wt	wt	S	wt	wt	wt	wt	no data				No data						S					R	rpsL[Rv0682:263_A>G(K88R)]					S
E1607041.L350	China	1.33	female	BALF	2016	new case	intensive phase	L2.2.1 Beijing Asian Modern 3.1	susceptible	S	wt	wt	wt	wt	S	wt	wt	wt	wt	wt	wt	S	wt	wt	wt	wt	no data				No data					Rv3083[Rv3083:1321_T>C(S441P)]	S			rrs_c380g[rrs:1472225_C>A], rrs_a493g[rrs:1472338_A>C]		S		rrs_c499t[rrs:1472344_C>T]				S
E1607252.L350	China	9.83	male	puncture fluid	2016	previously treated	intensive phase	L2.2.1 Beijing Asian Ancestral 3	MDR	R	rpoB[Rv0667:1349_C>T(S450L)]	rpoB[Rv0667:1349_C>T(S450L)]	rpoC[Rv0668:1471_A>G(I491V)]	wt	R	katG[Rv1908c:944_C>G(S315T)]	wt	wt	wt	wt	wt	R	wt	embB[Rv3795:916_A>G(M306V)]	wt	wt	no data	pncA[Rv2043c:202_A>G(W68R)]			No data		ethA[Rv3854c:781_G>A(R261W)], ethA[Rv3854c:798_G>C(S266R)]				S		whiB6[Rv3862c:296_G>A(A99V)]			R	rpsL[Rv0682:128_A>G(K43R)]	rrs_c499t[rrs:1472344_C>T]	whiB6[Rv3862c:296_G>A(A99V)]			S
E1608015.L350	China	12.17	male	Gastric juice	2016	new case	intensive phase	L2.2.1 Beijing Asian Modern 4	susceptible	S	wt	wt	wt	wt	S	wt	wt	wt	wt	wt	wt	S	wt	wt	wt	wt	no data				No data						S			rrs_c380g[rrs:1472225_C>A], rrs_a493g[rrs:1472338_A>C]		S		rrs_c499t[rrs:1472344_C>T]				S
E1608161.L350	China	10.17	female	urine	2016	new case	befrore treatment	L4.3.3 (LAM RD115)	susceptible	S	wt	wt	wt	wt	S	wt	wt	wt	wt	wt	wt	S	wt	wt	wt	wt	no data				No data						S					S						S
E1608241.L350	China	7.92	male	Gastric juice	2016	new case	befrore treatment	L2.2.1 Beijing Asian African 2	susceptible	S	wt	wt	wt	wt	S	wt	wt	wt	wt	wt	wt	S	wt	wt	wt	wt	no data				No data						S			rrs_c414t[rrs:1472259_C>A], rrs_c380g[rrs:1472225_C>A], rrs_a493g[rrs:1472338_A>C]		S		rrs_c499t[rrs:1472344_C>T]				S
E1610103.L350	China	0.33	male	sputum	2016	new case	befrore treatment	L2.2.1 Beijing Asian Modern 2	susceptible	S	wt	wt	wt	wt	S	wt	wt	wt	wt	wt	wt	S	wt	wt	wt	wt	no data				No data						S			rrs_c380g[rrs:1472225_C>A]		S						S
E1611072.L350	China	1.5	female	Gastric juice	2016	new case	intensive phase	L2.2.1 Beijing Asian Modern 1	susceptible	S	wt	wt	wt	wt	S	wt	wt	wt	wt	wt	wt	S	wt	wt	wt	wt	no data				No data						S			rrs_c380g[rrs:1472225_C>A]		S		rrs_c499t[rrs:1472344_C>T]				S
E1611149.L350	China	6.5	female	CSF	2016	new case	intensive phase	L2.2.1 Beijing Asian African 2	susceptible	S	wt	wt	wt	wt	S	wt	wt	wt	wt	wt	wt	S	wt	wt	wt	wt	no data				No data						S		whiB6_c-183g[IGR_4338522 _4338848:4338704_G>C]			S						S
E1611172.L350	China	0.08	male	Gastric juice	2016	new case	intensive phase	L2.2.1 Beijing Asian Modern 1	susceptible	S	wt	wt	wt	wt	S	wt	wt	wt	wt	wt	wt	S	wt	wt	wt	wt	no data				No data						S			rrs_c380g[rrs:1472225_C>A]		S		rrs_c499t[rrs:1472344_C>T]				S
E588.L350	China	7	male	BALF	2006	new case	befrore treatment	L2.2.1 Beijing Asian Modern 2	susceptible	S	wt	wt	wt	wt	S	wt	wt	wt	wt	wt	wt	S	wt	wt	wt	wt	no data				No data						S					S						S
EBJ10173.L350	China	8	female	BALF	2010	new case	intensive phase	L2.2.1 Beijing Asian African 3	susceptible	S	wt	wt	wt	wt	S	wt	wt	wt	wt	wt	wt	S	wt	wt	wt	wt	no data				No data						S					S						S
EBJ10174.L350	China	0.4	female	BALF	2010	new case	befrore treatment	L2.2.1 Beijing Asian Ancestral 2	susceptible	S	wt	wt	wt	wt	S	wt	wt	wt	wt	wt	wt	S	wt	wt	wt	wt	no data				No data						S					S						S	gyrA[Rv0006:269_C>T(A90V)]
EBJ10176.L350	China	3	male	BALF	2010	new case	intensive phase	L2.2.1 Beijing Asian African 1	susceptible	S	wt	wt	wt	wt	S	wt	wt	wt	wt	wt	wt	S	wt	wt	wt	wt	no data				No data						S					S						S
EBJ10178.L350	China	7	female	BALF	2010	new case	intensive phase	L2.2.1 Beijing Asian Modern 2	susceptible	S	wt	wt	wt	wt	S	wt	wt	wt	wt	wt	wt	S	wt	wt	wt	wt	no data				No data						S					S						S
EBJ10179.L350	China	0.7	male	BALF	2010	new case	intensive phase	L2.2.2 Beijing Asian Ancestral 1	susceptible	S	wt	wt	wt	wt	S	wt	wt	wt	wt	wt	wt	S	wt	wt	wt	wt	no data				No data						S					S						S
EBJ11071.L350	China	13	male	CSF	2011	previously treated	intensive phase	L2.2.1 Beijing Asian Ancestral 3	MDR	R	rpoB[Rv0667:1349_C>T(S450L)]	rpoB[Rv0667:1349_C>T(S450L)]	wt	wt	R	katG[Rv1908c:944_C>G(S315T)]	wt	wt	wt	wt	wt	R	wt	embB[Rv3795:918_G>C(M306I)]	wt	wt	no data				No data		ethA[Rv3854c:798_G>C(S266R)], ethA[Rv3854c:911_G>A(A304V)], ethA[Rv3854c:1022_G>T(A341E)]				S					R	rpsL[Rv0682:128_A>G(K43R)]					S
EET090.L350	China	2.17	male	BALF	2015	new case	befrore treatment	L2.2.1 Beijing Asian African 2	mono resistant	S	wt	wt	wt	wt	S	wt	wt	wt	wt	wt	wt	S	wt	wt	wt	wt	no data				No data						S					R	rpsL[Rv0682:128_A>G(K43R)]					S
EET091.L350	China	1.25	male	BALF	2014	new case	intensive phase	L2.2.1 Beijing Asian Modern 2	mono resistant	S	wt	wt	wt	wt	S	wt	wt	wt	wt	wt	wt	S	wt	wt	wt	wt	no data				No data						S					R	rpsL[Rv0682:128_A>G(K43R)]					S
ETBA030.L350	China	0.5	female	BALF	2011	new case	befrore treatment	L2.2.1 Beijing Asian Ancestral 2	susceptible	S	wt	wt	wt	wt	S	wt	wt	wt	wt	wt	wt	S	wt	wt	wt	wt	no data				No data		ethA[Rv3854c:798_G>C(S266R)]				S					S						S
ETBA146.L350	China	11	female	BALF	2011	new case	intensive phase	L2.2.1 Beijing Asian Modern 1	susceptible	S	wt	wt	wt	wt	S	wt	wt	wt	wt	wt	wt	S	wt	wt	wt	wt	no data				No data						S					S						S
ETBA166.L350	China	1.5	male	BALF	2011	new case	befrore treatment	L2.2.1 Beijing Asian Modern 2	susceptible	S	wt	wt	wt	wt	S	wt	wt	wt	wt	wt	wt	S	wt	wt	wt	wt	no data				No data						S					S						S
ETBA174.L350	China	1	male	BALF	2012	new case	continuation phase	L2.2.1 Beijing Asian African 2	susceptible	S	wt	wt	wt	wt	S	wt	wt	wt	wt	wt	wt	S	wt	wt	wt	wt	no data				No data						S					S						S
ETBA181.L350	China	0.7	male	BALF	2012	previously treated	intensive phase	L2.2.1 Beijing Asian Ancestral 2	MDR	R	rpoB[Rv0667:1349_C>T(S450L)]	rpoB[Rv0667:1349_C>T(S450L)]	wt	wt	R	katG[Rv1908c:944_C>G(S315T)]	wt	wt	wt	wt	wt	R	wt	embB[Rv3795:916_A>G(M306V)]	wt	wt	no data				No data						S			rrs_a-198c[mcr3:1471648_A>C		R	rpsL[Rv0682:128_A>G(K43R)]					S
ETBA193.L350	China	0.3	male	BALF	2012	new case	befrore treatment	L2.2.1 Beijing Asian Modern 2	mono resistant	S	wt	wt	wt	wt	S	wt	wt	wt	wt	wt	wt	S	wt	wt	wt	wt	no data				No data						S					R	rpsL[Rv0682:263_A>G(K88R)]					S
ETBA210.L350	China	5	male	BALF	2012	new case	befrore treatment	L2.2.1.1 Beijing Asian Modern 3.2 (Pacific RD150)	susceptible	S	wt	wt	wt	wt	S	wt	wt	wt	wt	wt	wt	S	wt	wt	wt	wt	no data				No data						S					S						S
ETBA221.L350	China	1	male	BALF	2012	new case	befrore treatment	L2.2.1 Beijing Asian Modern 3.1	susceptible	S	wt	wt	wt	wt	S	wt	wt	wt	wt	wt	wt	S	wt	wt	wt	wt	no data				No data						S					S						S
ETBA227.L350	China	0.3	female	BALF	2012	new case	befrore treatment	L2.2.1 Beijing Asian Modern 2	susceptible	S	wt	wt	wt	wt	S	wt	wt	wt	wt	wt	wt	S	wt	wt	wt	wt	no data				No data						S					S						S
ETBA239.L350	China	0.5	male	BALF	2012	new case	intensive phase	L4.4.2	susceptible	S	wt	wt	wt	wt	S	wt	wt	wt	wt	wt	wt	S	wt	embB[Rv3795:736_G>C(G246R)]	wt	wt	no data				No data			aftB_c-92t_(ubiA_302) [Rv3806c:4268928_G>A]			S					S						S
ETBA255.L350	China	14	male	pleural effusion	2012	new case	befrore treatment	L2.2.1 Beijing Asian Modern 2	susceptible	S	wt	wt	wt	wt	S	wt	wt	wt	wt	wt	wt	S	wt	wt	wt	wt	no data				No data						S					S						S
ETBA260.L350	China	2	female	BALF	2012	new case	intensive phase	L2.2.1 Beijing Asian African 1	susceptible	S	wt	wt	wt	wt	S	wt	wt	wt	wt	wt	wt	S	embC[Rv3793:1873_G>T(V625L)]	wt	wt	wt	no data				No data	mshA_c-66t_(Rv0485_433) [Rv0485:575282_C>T]					S					S						S
FJ05147.L350	China	14	female	no date	2005	previously treated	intensive phase	L2.2.1 Beijing Asian Ancestral 3	preXDR	R	rpoB[Rv0667:1349_C>T(S450L)]	rpoB[Rv0667:1349_C>T(S450L)]	wt	wt	R	katG[Rv1908c:944_C>G(S315T)]	wt	wt	wt	wt	wt	R	wt	embB[Rv3795:916_A>G(M306V)], embB[Rv3795:1217_G>C(G406A)]	wt	wt	no data	pncA[Rv2043c:226_T>G(T76P)]			No data		ethA[Rv3854c:798_G>C(S266R)]				S					R	rpsL[Rv0682:128_A>G(K43R)]					R
FJ05184.L350	China	8	female	no date	2005	new case	befrore treatment	L2.2.1 Beijing Asian Modern 2	MDR	R	rpoB[Rv0667:1349_C>T(S450L)]	rpoB[Rv0667:1349_C>T(S450L)]	wt	wt	R	katG[Rv1908c:1102_A>G(F368L)]	wt	fabG1_c-15t [IGR_1673300_1673439:1673425_C>T]	wt	wt	wt	R	wt	embB[Rv3795:916_A>G(M306V)]	wt	wt	no data	pncA[Rv2043c:410_T>C(H137R)]			No data			inhA_c-777t_(fabG1_c-15t) [IGR_1673300_1673439:1673425_C>T]			S					R	rpsL[Rv0682:128_A>G(K43R)]					S
FJ05408.L350	China	10	male	CSF	2005	new case	befrore treatment	L2.2.1.1 Beijing Asian Modern 3.2 (Pacific RD150)	preXDR	R	rpoB[Rv0667:1333_C>A(H445N)], rpoB[Rv0667:1354_C>G(L452V)]	rpoB[Rv0667:1333_C>A(H445N)], rpoB[Rv0667:1354_C>G(L452V)]	wt	wt	R	katG[Rv1908c:944_C>G(S315T)]	wt	wt	wt	wt	wt	R	wt	embB[Rv3795:916_A>G(M306V)]	wt	wt	no data				No data						S			rrs_a514t[rrs:1472359_A>C]		R		rrs_a514t[rrs:1472359_A>C]				R
GS06070.L350	China	8	female	sputum	2006	previously treated	continuation phase	L2.2.2 Beijing Asian Ancestral 1	MDR	R	rpoB[Rv0667:1289_T>C(L430P)], rpoB[Rv0667:1304_A>G(D435G)]	rpoB[Rv0667:1289_T>C(L430P)], rpoB[Rv0667:1304_A>G(D435G)]	wt	wt	R	katG[Rv1908c:944_C>G(S315T)]	wt	wt	wt	wt	wt	R	wt	embB[Rv3795:916_A>G(M306V)]	wt	wt	no data	pncA[Rv2043c:422_T>G(Q141P)]			No data						S					R					gid[Rv3919c:101_C>A(G34V)]	S
GS12086.L350	China	12	male	sputum	2012	new case	befrore treatment	L2.2.1.1 Beijing Asian Modern 3.2 (Pacific RD150)	preXDR	R	rpoB[Rv0667:1295_A>C(Q432P)]	rpoB[Rv0667:1295_A>C(Q432P)]	wt	wt	R	wt	wt	fabG1_L203L[Rv1483:1674048_G>A]	wt	wt	wt	S	wt	wt	wt	wt	no data				No data		ethA[Rv3854c:761_T>G(Q254P)]	inhA_g-154a_(fabG1_L203L) [Rv1483:1674048_G>A]			S					S						R	gyrA[Rv0006:281_A>G(D94G)]
GS12104.L350	China	10	female	sputum	2012	previously treated	continuation phase	L2.2.1 Beijing Asian Modern 2	MDR	R	rpoB[Rv0667:1349_C>T(S450L)]	rpoB[Rv0667:1349_C>T(S450L)]	wt	wt	R	wt	wt	wt	wt	wt	wt	R	wt	embB[Rv3795:916_A>G(M306V)]	wt	wt	no data				No data			inhA_c-777t_(fabG1_c-15t) [IGR_1673300_1673439:1673425_C>T]			S		whiB6[Rv3862c:254_C>T(G85D)]			R	rpsL[Rv0682:128_A>G(K43R)]		whiB6[Rv3862c:254_C>T(G85D)]			S
GS12233.L350	China	9	male	sputum	2012	new case	befrore treatment	L4.5 (RD122)	preXDR	R	rpoB[Rv0667:1349_C>T(S450L)]	rpoB[Rv0667:1349_C>T(S450L)]	wt	wt	R	katG[Rv1908c:944_C>G(S315T)]	wt	wt	wt	wt	wt	R	wt	embB[Rv3795:918_G>C(M306I)]	wt	wt	no data				No data						S					R					gid[Rv3919c:212_C>T(G71E)]	R	gyrA[Rv0006:281_A>G(D94G)]
JL06144.L350	China	8	male	sputum	2006	previously treated	intensive phase	L2.2.1 Beijing Asian Modern 4	preXDR	R	rpoB[Rv0667:1309_A>G(N437D), rpoB[Rv0667:1355_T>C(L452P)]	rpoB[Rv0667:1309_A>G(N437D), rpoB[Rv0667:1355_T>C(L452P)]	wt	wt	R	katG[Rv1908c:694_G>C(P232A)]	wt	wt	ahpC_g-48a [IGR_2726088_2726192:2726145_G>A]	wt	wt	R	wt	wt	wt	ubiA[Rv3806c:536_A>G(I179T)]	no data				No data						S			rrs_t-188c[mcr3:1471658_T>C]		R	rpsL[Rv0682:263_A>G(K88R)]					R	gyrA[Rv0006:269_C>T(A90V)]
JL06223.L350	China	0.1	male	sputum	2006	previously treated	intensive phase	L2.2.1 Beijing Asian African 2	MDR	R	rpoB[Rv0667:1349_C>T(S450L)]	rpoB[Rv0667:1349_C>T(S450L)]	wt	wt	R	wt	wt	wt	wt	wt	wt	R	wt	embB[Rv3795:1489_C>A(Q497K)]	wt	wt	no data				No data						S					R	rpsL[Rv0682:128_A>G(K43R)]					S
JL06236.L350	China	11	male	sputum	2006	previously treated	intensive phase	L4.5 (RD122)	MDR	R	rpoB[Rv0667:508_G>T(V170F)	wt	rpoC[Rv0668:1471_A>G(I491V)]	wt	R	katG[Rv1908c:944_C>G(S315T)]	wt	wt	wt	wt	wt	R	wt	embB[Rv3795:1741_A>G(T581A)]	wt	wt	no data				No data						R			rrs_a493g[rrs:1472338_A>C]		S					gid[Rv3919c:230_A>G(V77A)]	S	gyrA[Rv0006:269_C>T(A90V)]
TBA031.L350	China	0.7	male	BALF	2011	new case	intensive phase	L2.2.1 Beijing Asian Modern 2	susceptible	S	wt	wt	wt	wt	S	wt	wt	wt	wt	wt	wt	S	wt	wt	wt	wt	no data				No data						S					S						S
TBA204.L350	China	1	female	BALF	2012	new case	befrore treatment	L2.2.1 Beijing Asian African 2	susceptible	S	wt	wt	wt	wt	S	wt	wt	wt	wt	wt	wt	S	wt	wt	wt	wt	no data				No data						S			rrs_c380g[rrs:1472225_C>A]		S		rrs_c499t[rrs:1472344_C>T]				S
XZ06044.L350	China	14	male	no date	2006	previously treated	continuation phase	L2.2.1 Beijing Asian Modern 4	MDR	R	rpoB[Rv0667:1349_C>T(S450L)]	rpoB[Rv0667:1349_C>T(S450L)]	wt	wt	R	katG[Rv1908c:944_C>G(S315T)]	wt	wt	wt	wt	wt	R	wt	embB[Rv3795:1490_A>G(Q497R)]	wt	wt	no data	pncA_a-11g [IGR_2289242_2289281:2289252_T>C]			No data						S					R	rpsL[Rv0682:128_A>G(K43R)]					S
XZ06058.L350	China	8	male	no date	2006	previously treated	continuation phase	L2.2.1 Beijing Asian Modern 2	preXDR	R	rpoB[Rv0667:1349_C>T(S450L)]	rpoB[Rv0667:1349_C>T(S450L)]	wt	wt	R	katG[Rv1908c:944_C>G(S315T)]	wt	wt	wt	wt	wt	S	wt	wt	embA_c-16t[IGR_4243148_4243232:4243217_C>T]		no data	pncA[Rv2043c:287_T>C(K96R)]			No data						S					R	rpsL[Rv0682:128_A>G(K43R)]					R	gyrA[Rv0006:281_A>G(D94G)]
XZ06182.L350	China	4	male	sputum	2006	previously treated	continuation phase	L2.2.1 Beijing Asian Modern 3.1	MDR	R	rpoB[Rv0667:1355_T>C(L452P)]	rpoB[Rv0667:1355_T>C(L452P)]	wt	wt	R	katG[Rv1908c:386_A>G(F129S)]	wt	wt	wt	wt	wt	S	wt	embB[Rv3795:1217_G>C(G406A)]	wt	wt	no data	pncA[Rv2043c:11_A>G(L4S)]			No data						S					R					gid[Rv3919c:320_T>C(D107G)]	S
XZ06215.L350	China	3	female	sputum	2006	previously treated	continuation phase	L2.2.1 Beijing Asian Modern 4	MDR	R	rpoB[Rv0667:1333_C>A(H445N)], rpoB[Rv0667:1334_A>G(H445R)]	rpoB[Rv0667:1333_C>A(H445N)], rpoB[Rv0667:1334_A>G(H445R)]	wt	wt	R	katG[Rv1908c:944_C>G(S315T)]	wt	wt	wt	wt	wt	S	wt	embB[Rv3795:3005_A>G(H1002R)]	wt	wt	no data				No data						S			rrs_a493g[rrs:1472338_A>C]	eis_c-12a[IGR_2715333 _2715471:2715344_G>A]	R	rpsL[Rv0682:128_A>G(K43R)]					S
[truncated: 13 more columns]
