# Supplementary material for: Insight into Population Structure and Drug Resistance of Pediatric Tuberculosis Strains from China and Russia Gained through Whole-Genome Sequencing
Source: Int J Mol Sci. 2023 Jun 18;24(12):10302. doi: 10.3390/ijms241210302 (PMC10299545; doi:10.3390/ijms241210302)
Supplement: Supplementary file 1 [file ijms-24-10302-s001.zip › Table_S2.xlsx]

## Sheet: discordant data
Table S2. Discordatnt results of phenotypic and genotypic detection of drug resistance
ID	origin	age	sex	material	data	new case/previously treated case	Treatment phase (before treatment, intensive phase, continuation phase, maintenance phase)	genotypes	DR type	RIF phenotype	rpoB complete	rpoB RRDR	rpoC	Rv2752c	INH phenotype	katG	inhA	fabG1	ahpC	Rv1258c	Rv2752c	EMB phenotype	embC	embB	embA	ubiA	PZA phenotype	pncA	Rv3236c	PPE35	ETH phenotype	mshA	ethA	inhA	ndh	Rv3083	KAN phenotype	whiB7	whiB6	rrs	eis	STR phenotype	rpsL	whiB6	whiB7	gid B	MXF/OFX/LEV phenotype	gyrA	gyrB
IM28-2036	Russia	no data	male	vertebrae	2011	new cases	continuation phase	L2.2.1 Beijing Central Asian Russian	preXDR	R	wt	wt	wt	wt	R	katG[Rv1908c:944_C>G(S315T)]	wt	wt	wt	wt	wt	R	wt	wt	wt	wt	no data	wt	wt	wt		wt	wt	wt	wt	wt	S	wt	wt	wt	wt	R	wt	wt	wt	wt	R	wt	wt
IM63-7127	Russia	5.3	male	vertebrae	2018	new cases	continuation phase	L2.2.1 Beijing Central Asian Russian	MDR	R	wt	wt	wt	wt	R	katG[Rv1908c:944_C>G(S315T)]	wt	wt	wt	wt	wt	S	wt	embB[Rv3795:916_A>G(M306V)]	wt	wt	no data	wt	wt	wt		wt	ethA[Rv3854c:941_G>A(T314I)]	wt	wt	wt	S	wt	wt	wt	eis_c-14t[IGR_2715333 _2715471:2715346_G>A]	R	rpsL[Rv0682:128_A>G(K43R)]	wt	wt	wt	S	wt	wt
IM78-2924	Russia	5.6	female	bone	2016	new cases	continuation phase	L4.1.2.1 (Ural)	preXDR	R	wt	wt	wt	wt	R	wt	wt	wt	wt	wt	wt	S	wt	wt	wt	wt	no data	wt	wt	wt		wt	wt	wt	wt	wt	R	wt	wt	wt	wt	R	wt	wt	wt	wt	R	wt	wt
E140923.L350	China	11	female	BALF	2014	new case	intensive phase	L2.2.1 Beijing Asian Modern 2	MDR	R	wt	wt	wt	wt	R	wt	wt	wt	wt	wt	wt	S	wt	wt	wt	wt	no data	wt	wt	wt		wt	wt	wt	wt	wt	S	wt	wt	wt	wt	S	wt	wt	wt	wt	S	wt	wt
JL06223.L350	China	0.1	male	sputum	2006	previously treated	intensive phase	L2.2.1 Beijing Asian African 2	MDR	R	rpoB[Rv0667:1349_C>T(S450L)]	rpoB[Rv0667:1349_C>T(S450L)]	wt	wt	R	wt	wt	wt	wt	wt	wt	R	wt	embB[Rv3795:1489_C>A(Q497K)]	wt	wt	no data	wt	wt	wt		wt	wt	wt	wt	wt	S	wt	wt	wt	wt	R	rpsL[Rv0682:128_A>G(K43R)]	wt	wt	wt	S	wt	wt
[truncated: 20 more columns]
